# Supplementary material for: Transcriptional Convergence of Oligodendrocyte Lineage Progenitors during Development
Source: PubMed Central journal article supplement (PMC6104814; doi:10.1016/j.devcel.2018.07.005), 2018-08-20
Supplement: mmc1.pdf [file mmc1.pdf]

**Developmental Cell, Volume 46**

**Supplemental Information**

**Transcriptional Convergence of Oligodendrocyte Lineage Progenitors  
during Development**

**Sueli Marques, David van Bruggen, Darya Pavlovna Vanichkina, Elisa Mariagrazia Floriddia, Hermany Munguba, Leif Våremo, Stefania Giacomello, Ana Mendanha Falcão, Mandy Meijer, Åsa Kristina Björklund, Jens Hjerling-Leffler, Ryan James Taft, and Gonçalo Castelo-Branco**

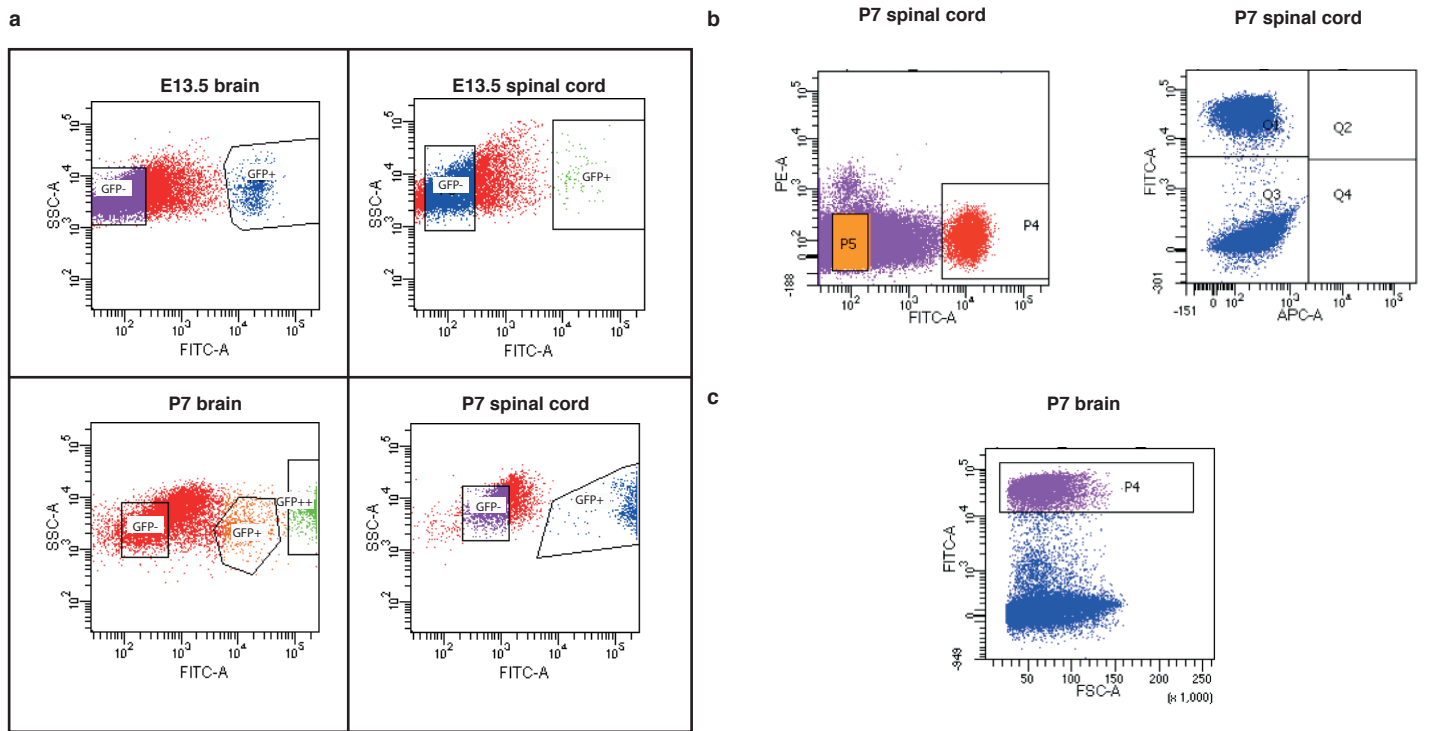

**d**

| Dataset | Reads    | Uniquely mapped | Median TIN | Spliced Reads | Stranding | Partially novel SJ | Novel SJ | Total SJ | GTAG   | GCAG  | ATAC  | Non-canonical SJ |
|---------|----------|-----------------|------------|---------------|-----------|--------------------|----------|----------|--------|-------|-------|------------------|
| E13.5B1 | 46837623 | 87.73%          | 76.78      | 24.03%        | 98.87%    | 16%                | 8%       | 13424516 | 98.99% | 0.86% | 0.10% | 0.06%            |
| E13.5B2 | 53041658 | 86.42%          | 77.01      | 22.33%        | 98.08%    | 15%                | 8%       | 13995601 | 98.98% | 0.86% | 0.10% | 0.06%            |
| E13.5B3 | 42836948 | 83.84%          | 74.90      | 23.78%        | 98.29%    | 14%                | 8%       | 12104537 | 98.97% | 0.87% | 0.10% | 0.07%            |
| E13.5S1 | 46481407 | 88.30%          | 75.49      | 17.43%        | 98.77%    | 14%                | 8%       | 9710372  | 99.05% | 0.80% | 0.09% | 0.06%            |
| E13.5S2 | 60703882 | 89.39%          | 76.32      | 17.59%        | 97.63%    | 15%                | 9%       | 12791166 | 99.05% | 0.80% | 0.09% | 0.06%            |
| E13.5S3 | 37869824 | 72.44%          | 67.54      | 8.54%         | 98.31%    | 8%                 | 4%       | 3883562  | 99.00% | 0.84% | 0.09% | 0.06%            |
| P7B1    | 49518204 | 85.75%          | 83.49      | 35.33%        | 67.19%    | 18%                | 9%       | 20712958 | 98.98% | 0.85% | 0.11% | 0.06%            |
| P7B2    | 46121858 | 83.53%          | 83.21      | 34.65%        | 60.02%    | 17%                | 9%       | 18910438 | 98.99% | 0.84% | 0.11% | 0.06%            |
| P7B3    | 58598593 | 85.69%          | 82.87      | 34.24%        | 81.27%    | 19%                | 10%      | 23710326 | 98.99% | 0.84% | 0.11% | 0.06%            |
| P7S1    | 66036696 | 84.30%          | 83.84      | 38.28%        | 89.37%    | 21%                | 10%      | 29950121 | 99.01% | 0.83% | 0.10% | 0.06%            |
| P7S2    | 56877838 | 84.34%          | 83.30      | 37.91%        | 79.41%    | 20%                | 9%       | 25495488 | 99.01% | 0.83% | 0.11% | 0.06%            |
| P7S3    | 55570228 | 85.17%          | 82.73      | 38.94%        | 76.44%    | 18%                | 9%       | 25793768 | 98.99% | 0.84% | 0.11% | 0.07%            |

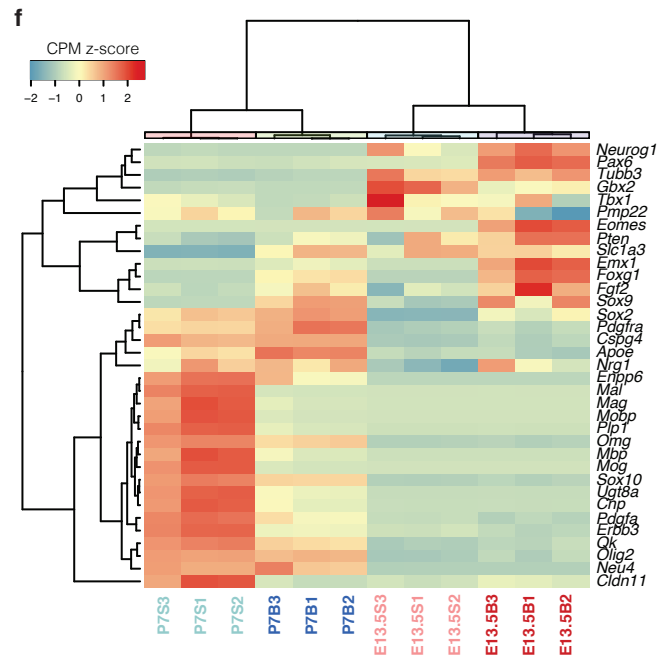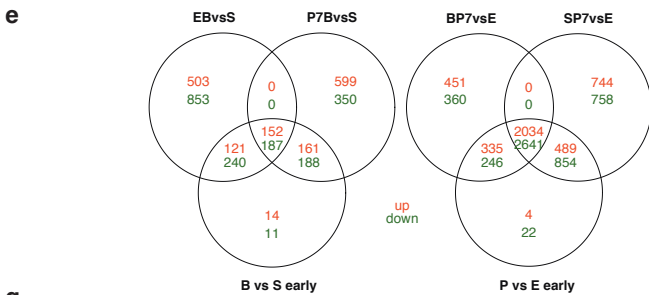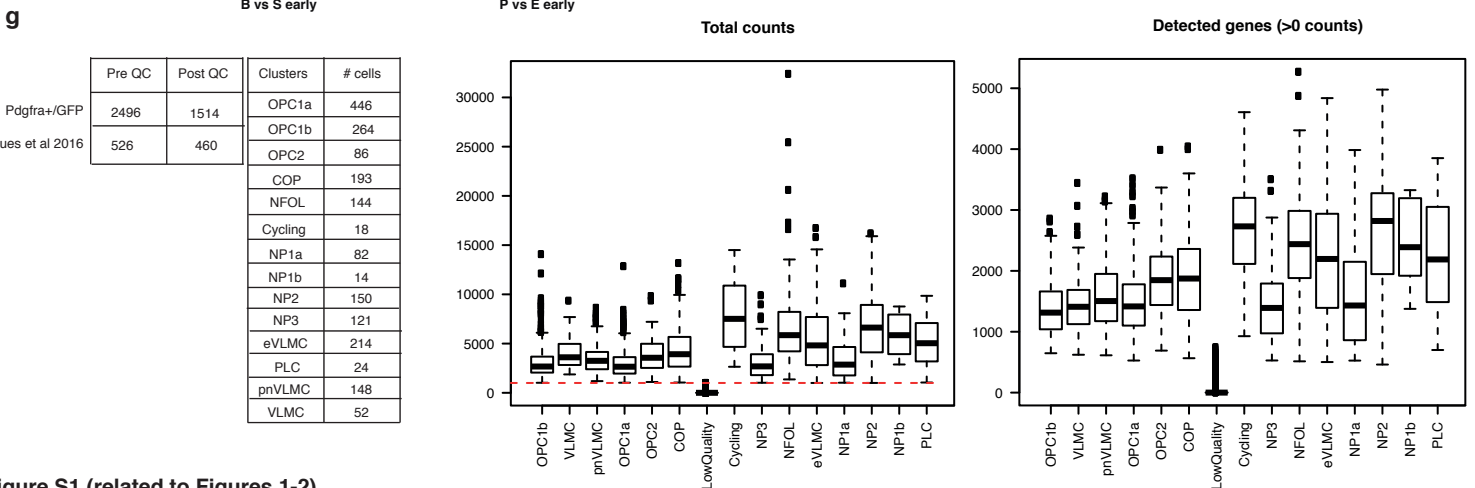

**Figure S1 (related to Figures 1-2)**

- a) FACS sorting graph, highlighting selected *Pdgfra*+/*GFP* cells for bulk RNA-Seq;  
 b) FACS gating of *GFP*+ cells (FITC) from the P7 spinal cord of *Pdgfra*-H2B-*GFP* mice in 2 independent single cell RNA-Seq experiments.  
 c) FACS gating of *GFP*+ cells (FITC) from the P7 brain of *Pdgfra*-H2B-*GFP* mice in a single cell RNA-Seq experiment.  
 d) Bulk sequencing library depth and mapping statistics  
 e) Overlap between differentially expressed genes at each of the stages and regions investigated in the bulk RNA-Seq;  
 f) Heatmap showing hierarchical clustering of bulk samples based on normalised gene expression (counts per million mapped reads, cpm) of selected genes involved in oligodendrocyte lineage progression;  
 g) Single-Cell RNA sequencing Quality Control.

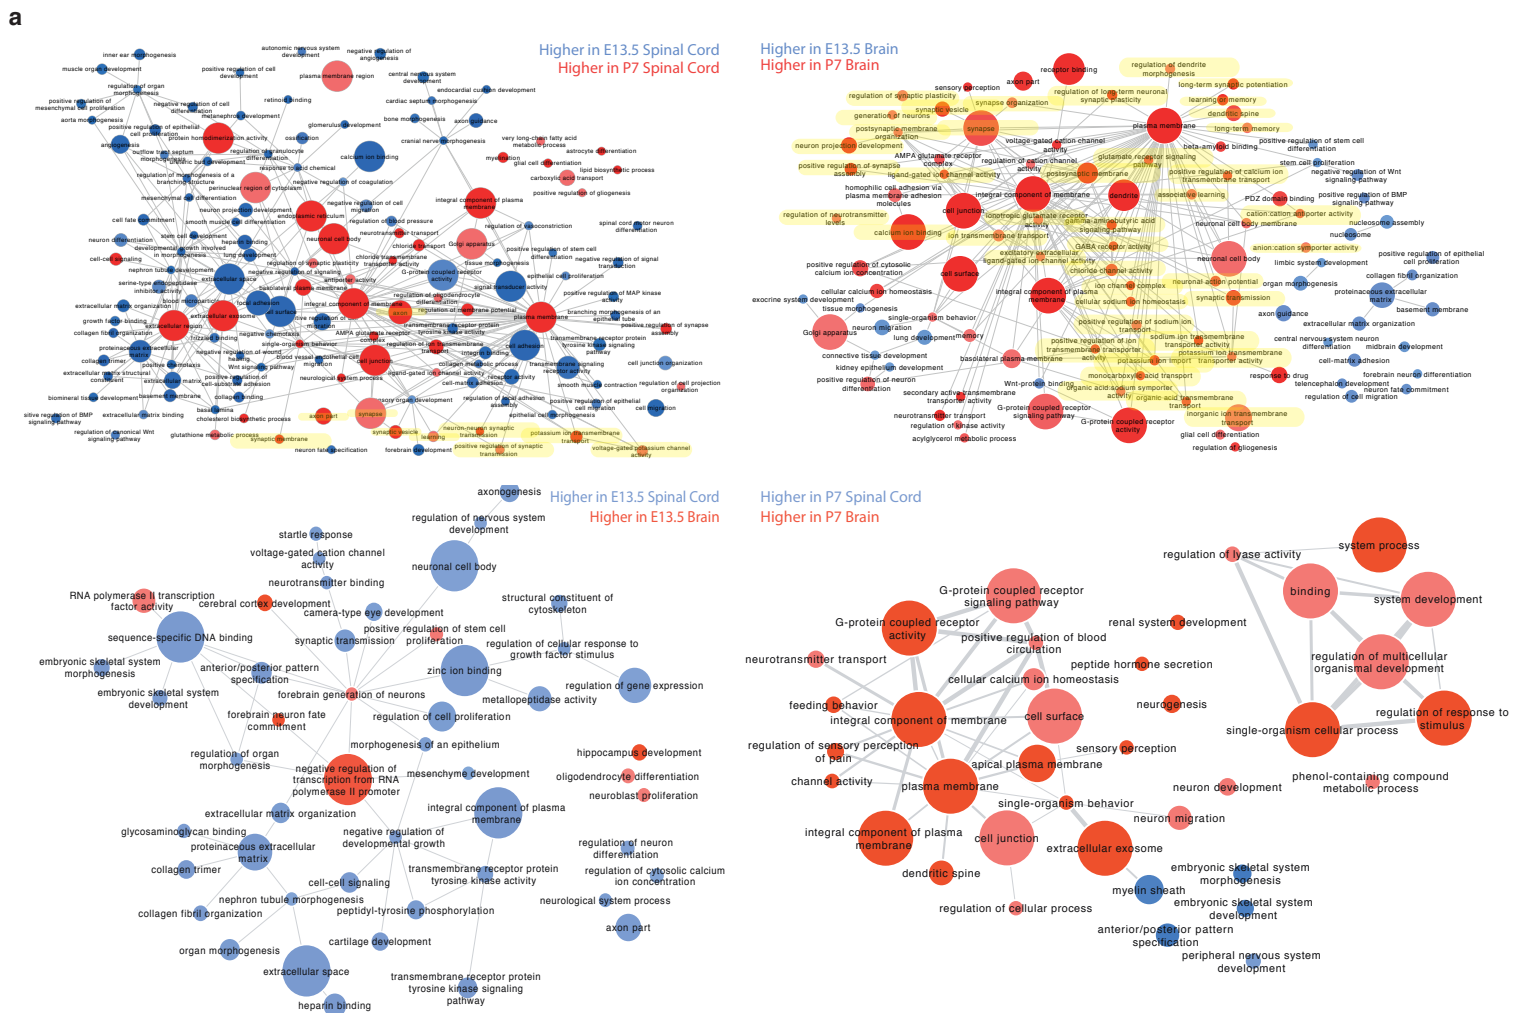

**Figure S2 (related to Figure 1)**

a) Gene ontology analysis with enriched functions overrepresented in either E13.5 versus P7 brain, and E13.5 versus P7 spinal cord.  
 b) Hierarchical clustering of bulk samples based on normalised gene expression (cpmm) of potassium and calcium channels, GABA, Sodium, HCN and TRP receptors and neuromodulator-related, glutamate receptor genes observed in the bulk sequencing in *Pdgfra*+/*GFP* cells;  
 c) Hierarchical clustering of bulk samples based on normalised gene expression (cpmm) of pericyte marker and collagen related genes observed in the bulk sequencing of *Pdgfra*+/*GFP* cells

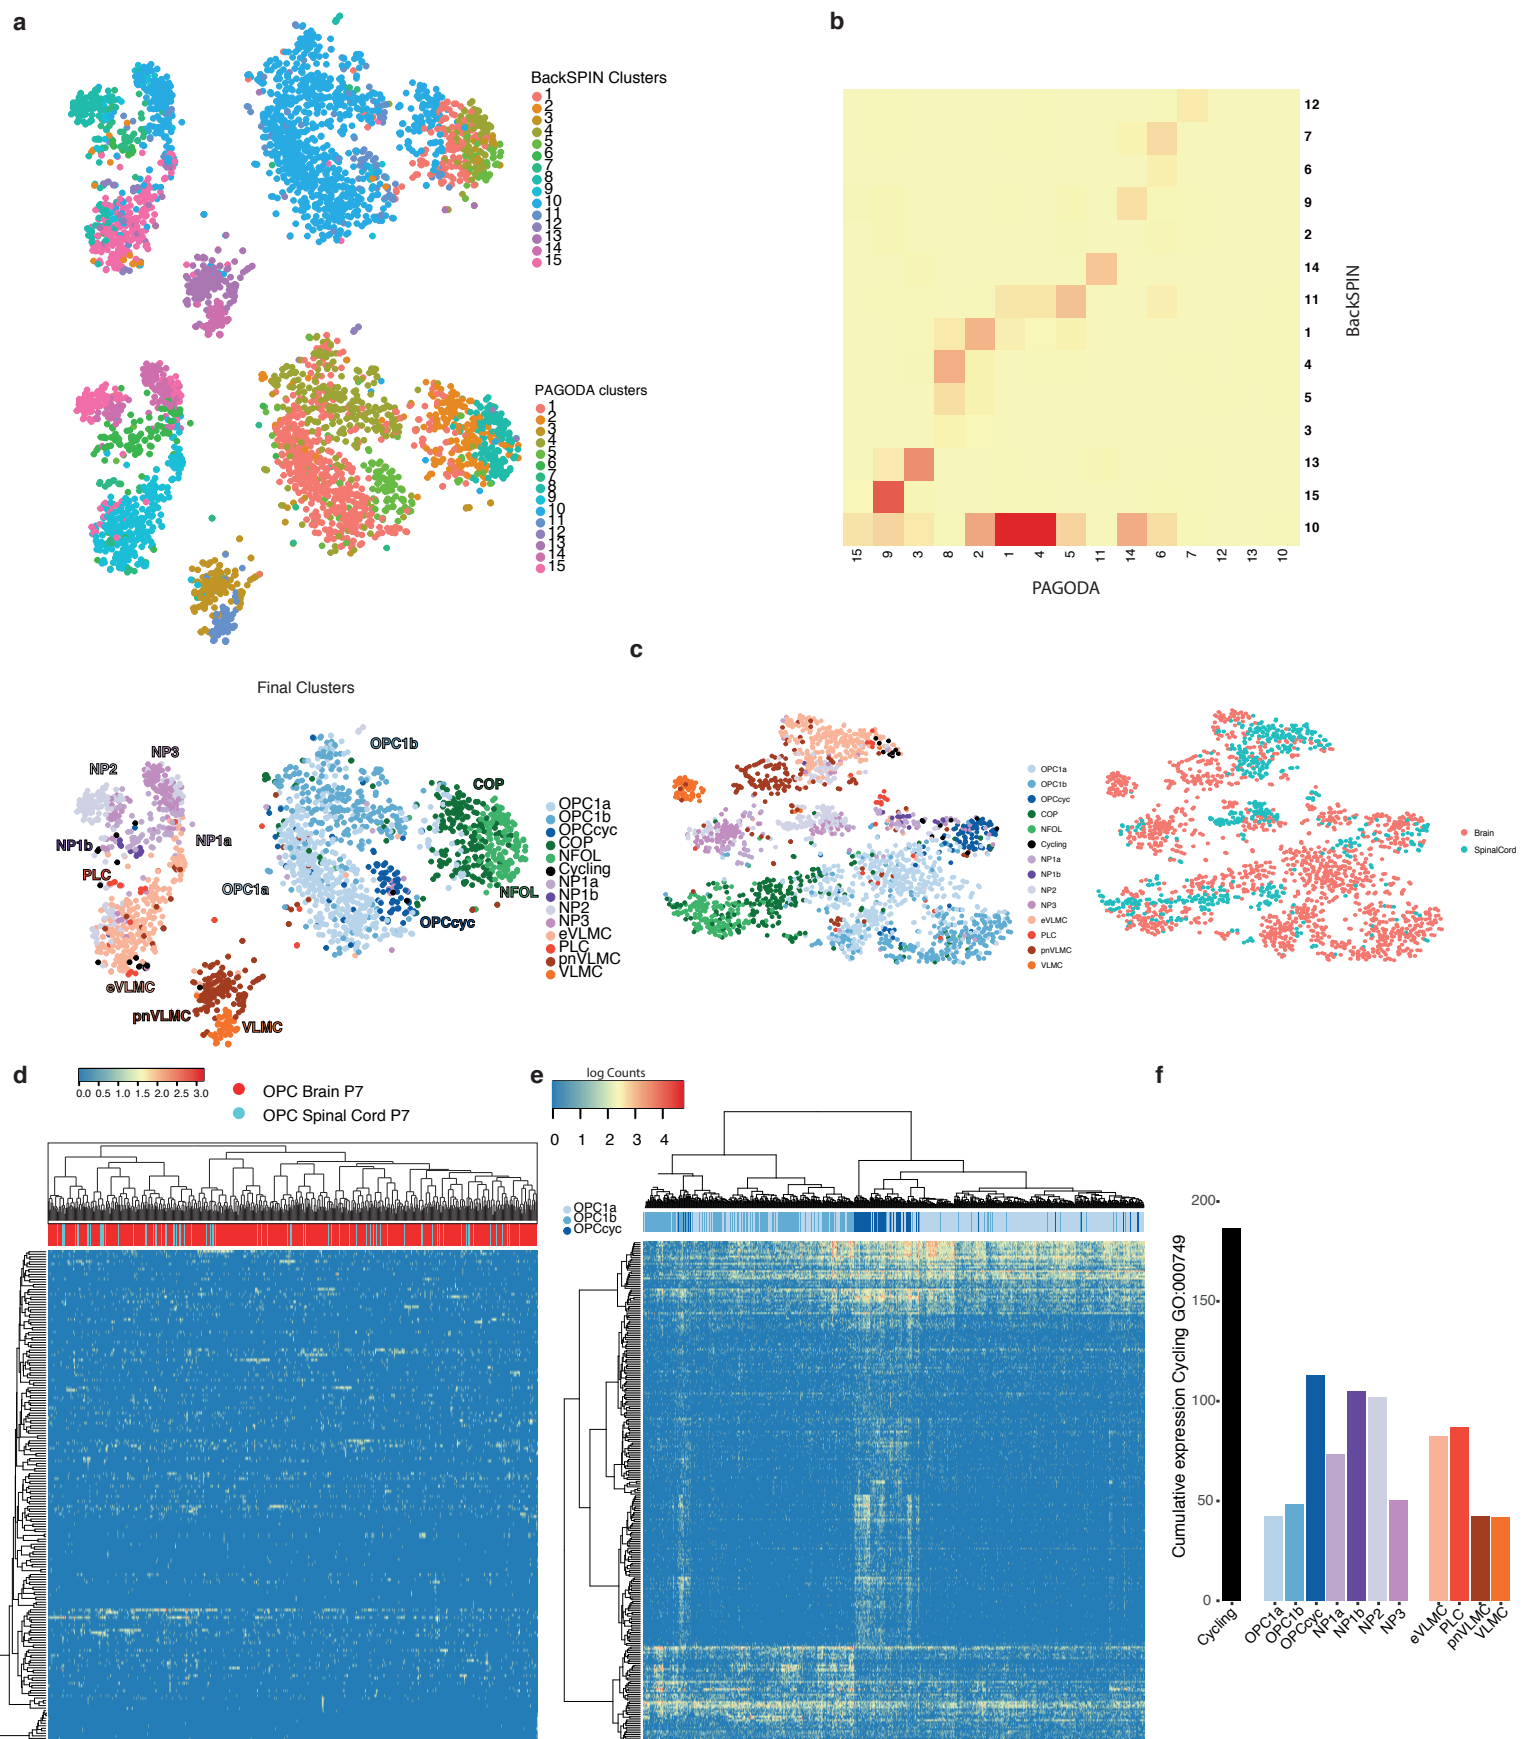

**Figure S3 (related with Figure 2)**

- a) Differences and commonalities in the BackSPIN2 and PAGODA derived clusters, and the merged and final clusters as shown by tSNE;
- b) Cluster overlap comparing PAGODA and BackSpin2, colorshaded by number of cells;
- c) Noise corrected t-SNE after removal of hidden confounding factors using the f-sclVM package
- d) Hierarchically clustered heatmap of top differentially expressed genes between Brain and Spinal Cord P7 OPCs, as assessed by SCDE
- e) Hierarchically clustered heatmap of top differentially expressed genes between OPC1a, OPC1b, and OPCcyc, as assessed by SCDE
- f) Total molecule count of cell cycle gene expression taken from GO:000749 among the different cell populations;

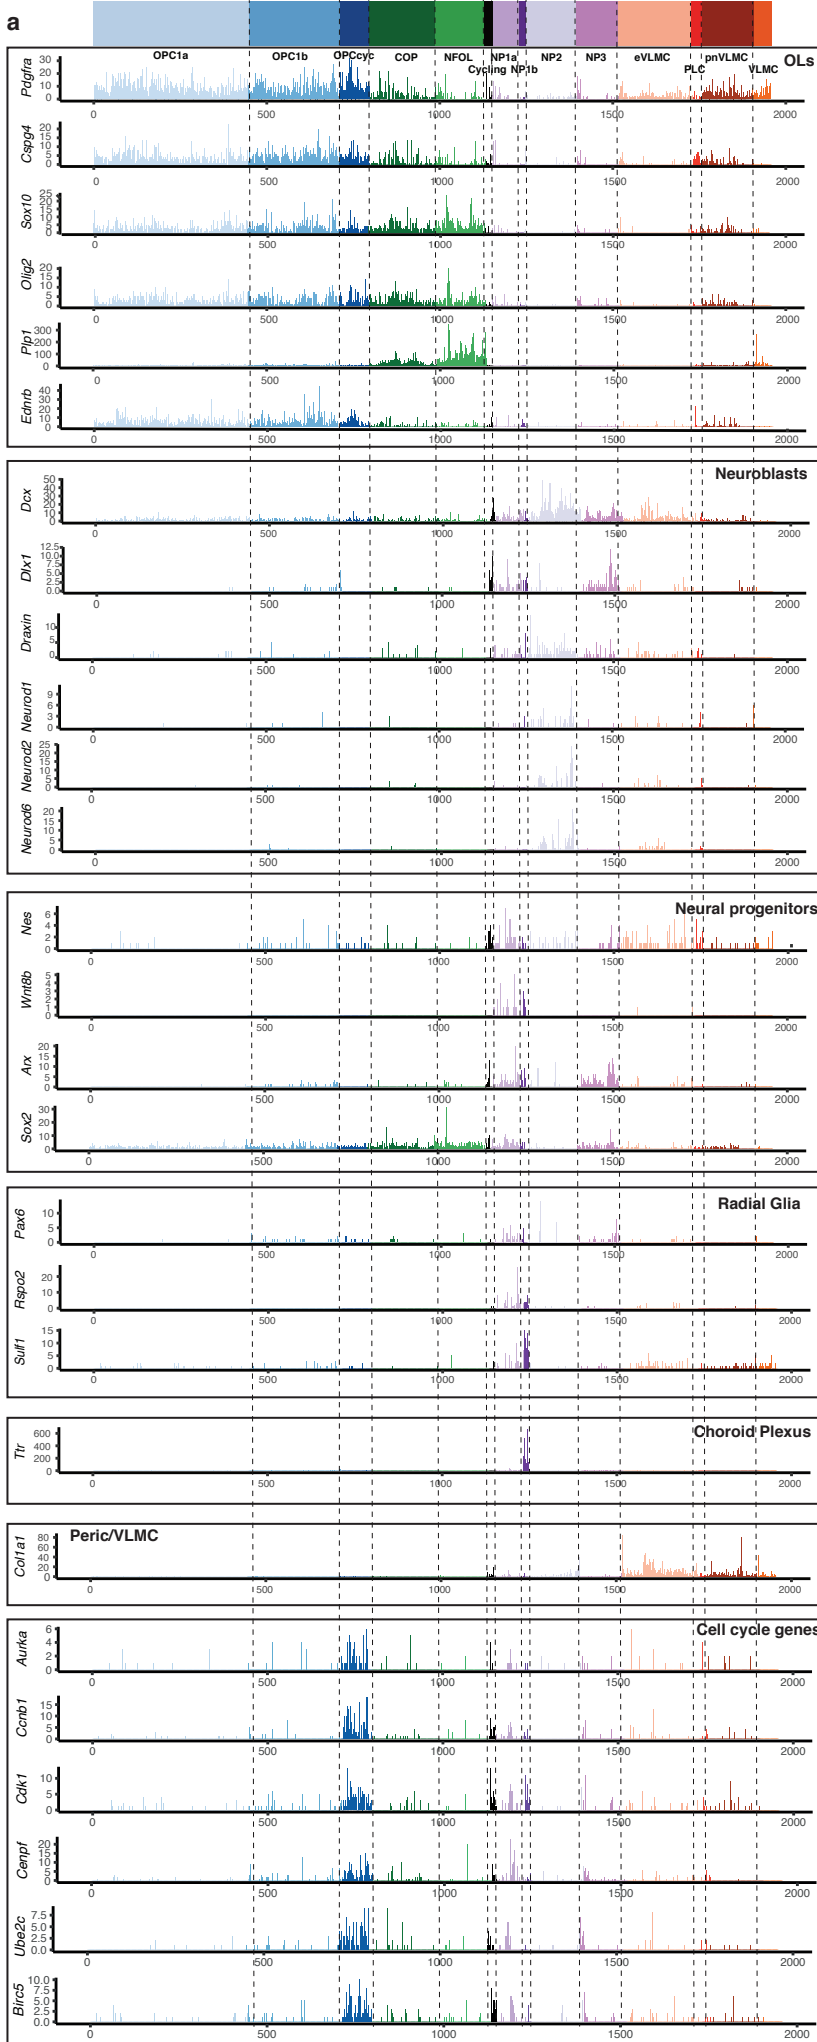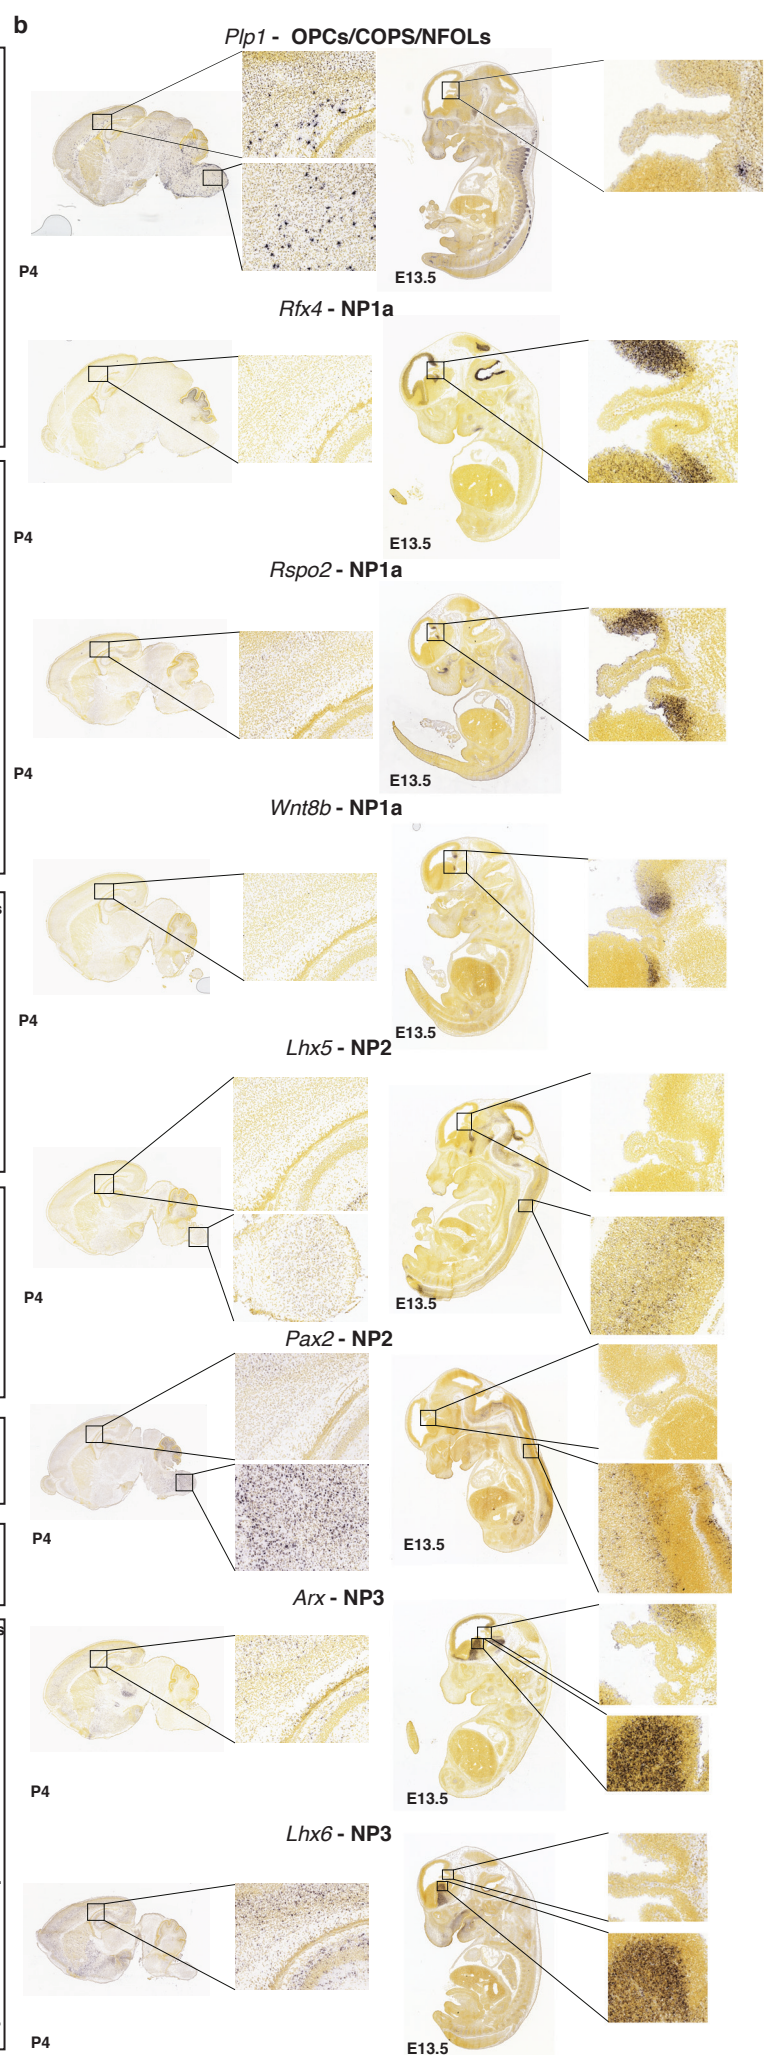

**Figure S4 (related to Figure 2) a) Single cell expression of known markers of different lineages in the different clusters, and of cell cycle genes.**

**b) In situ hybridisation of NP markers at E13.5 and P4 mouse CNS, from @2013 Allen Developing Mouse Brain Atlas**

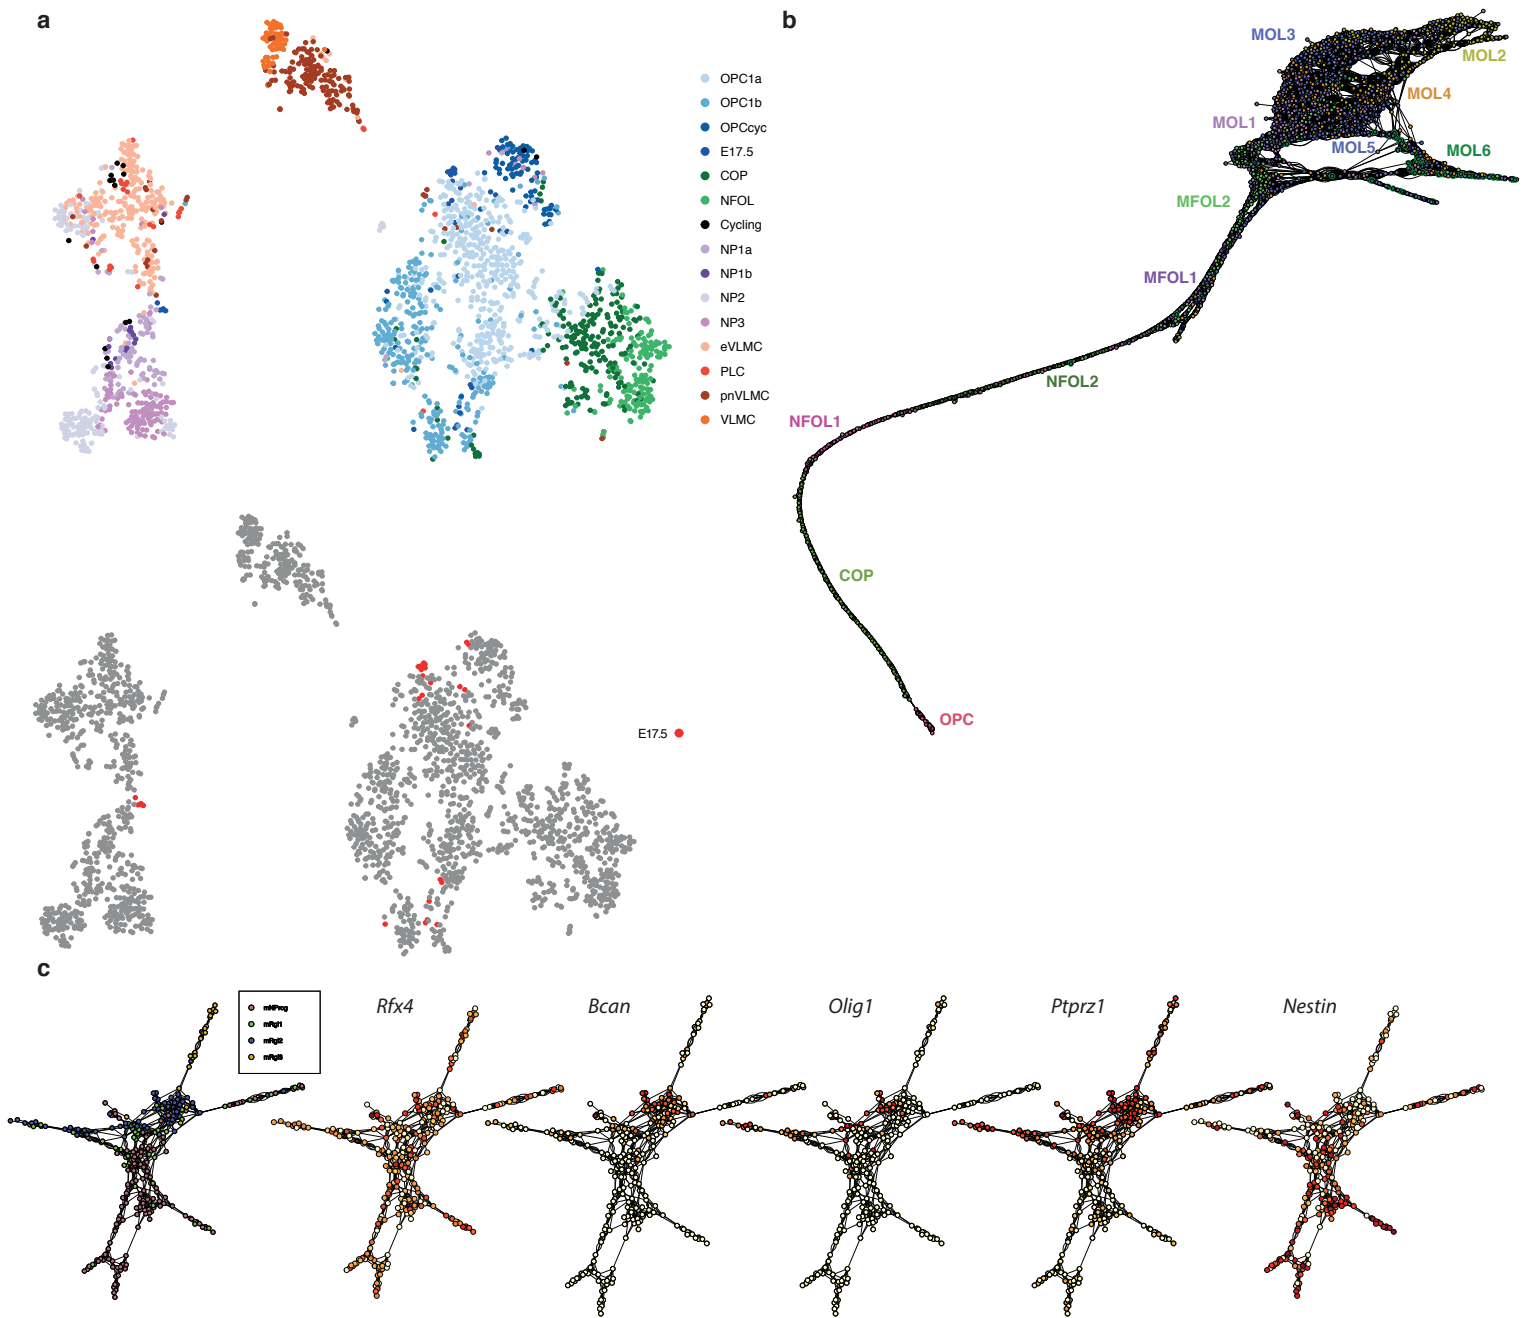

**Figure S5 (related to Figure 3)**

a) t-SNE representation of single cell data as in Figure 2c, including in addition E17.5 *Pdgfra*+/*GFP* cells

b) SCN3E network analysis of the 12 OL lineage populations identified in Marques et al 2016, as a proof of concept of the SCN3E; Myelin forming oligodendrocytes (MFOL)1 was suggested to be upstream mature oligodendrocytes MOL1, while MFOL2 was connected to MOL5;

c) SCN3E network analysis of embryonic ventral midbrain single-cell RNA-Seq from La Manno et al, 2016, with a focus on *Rfx4*+ populations

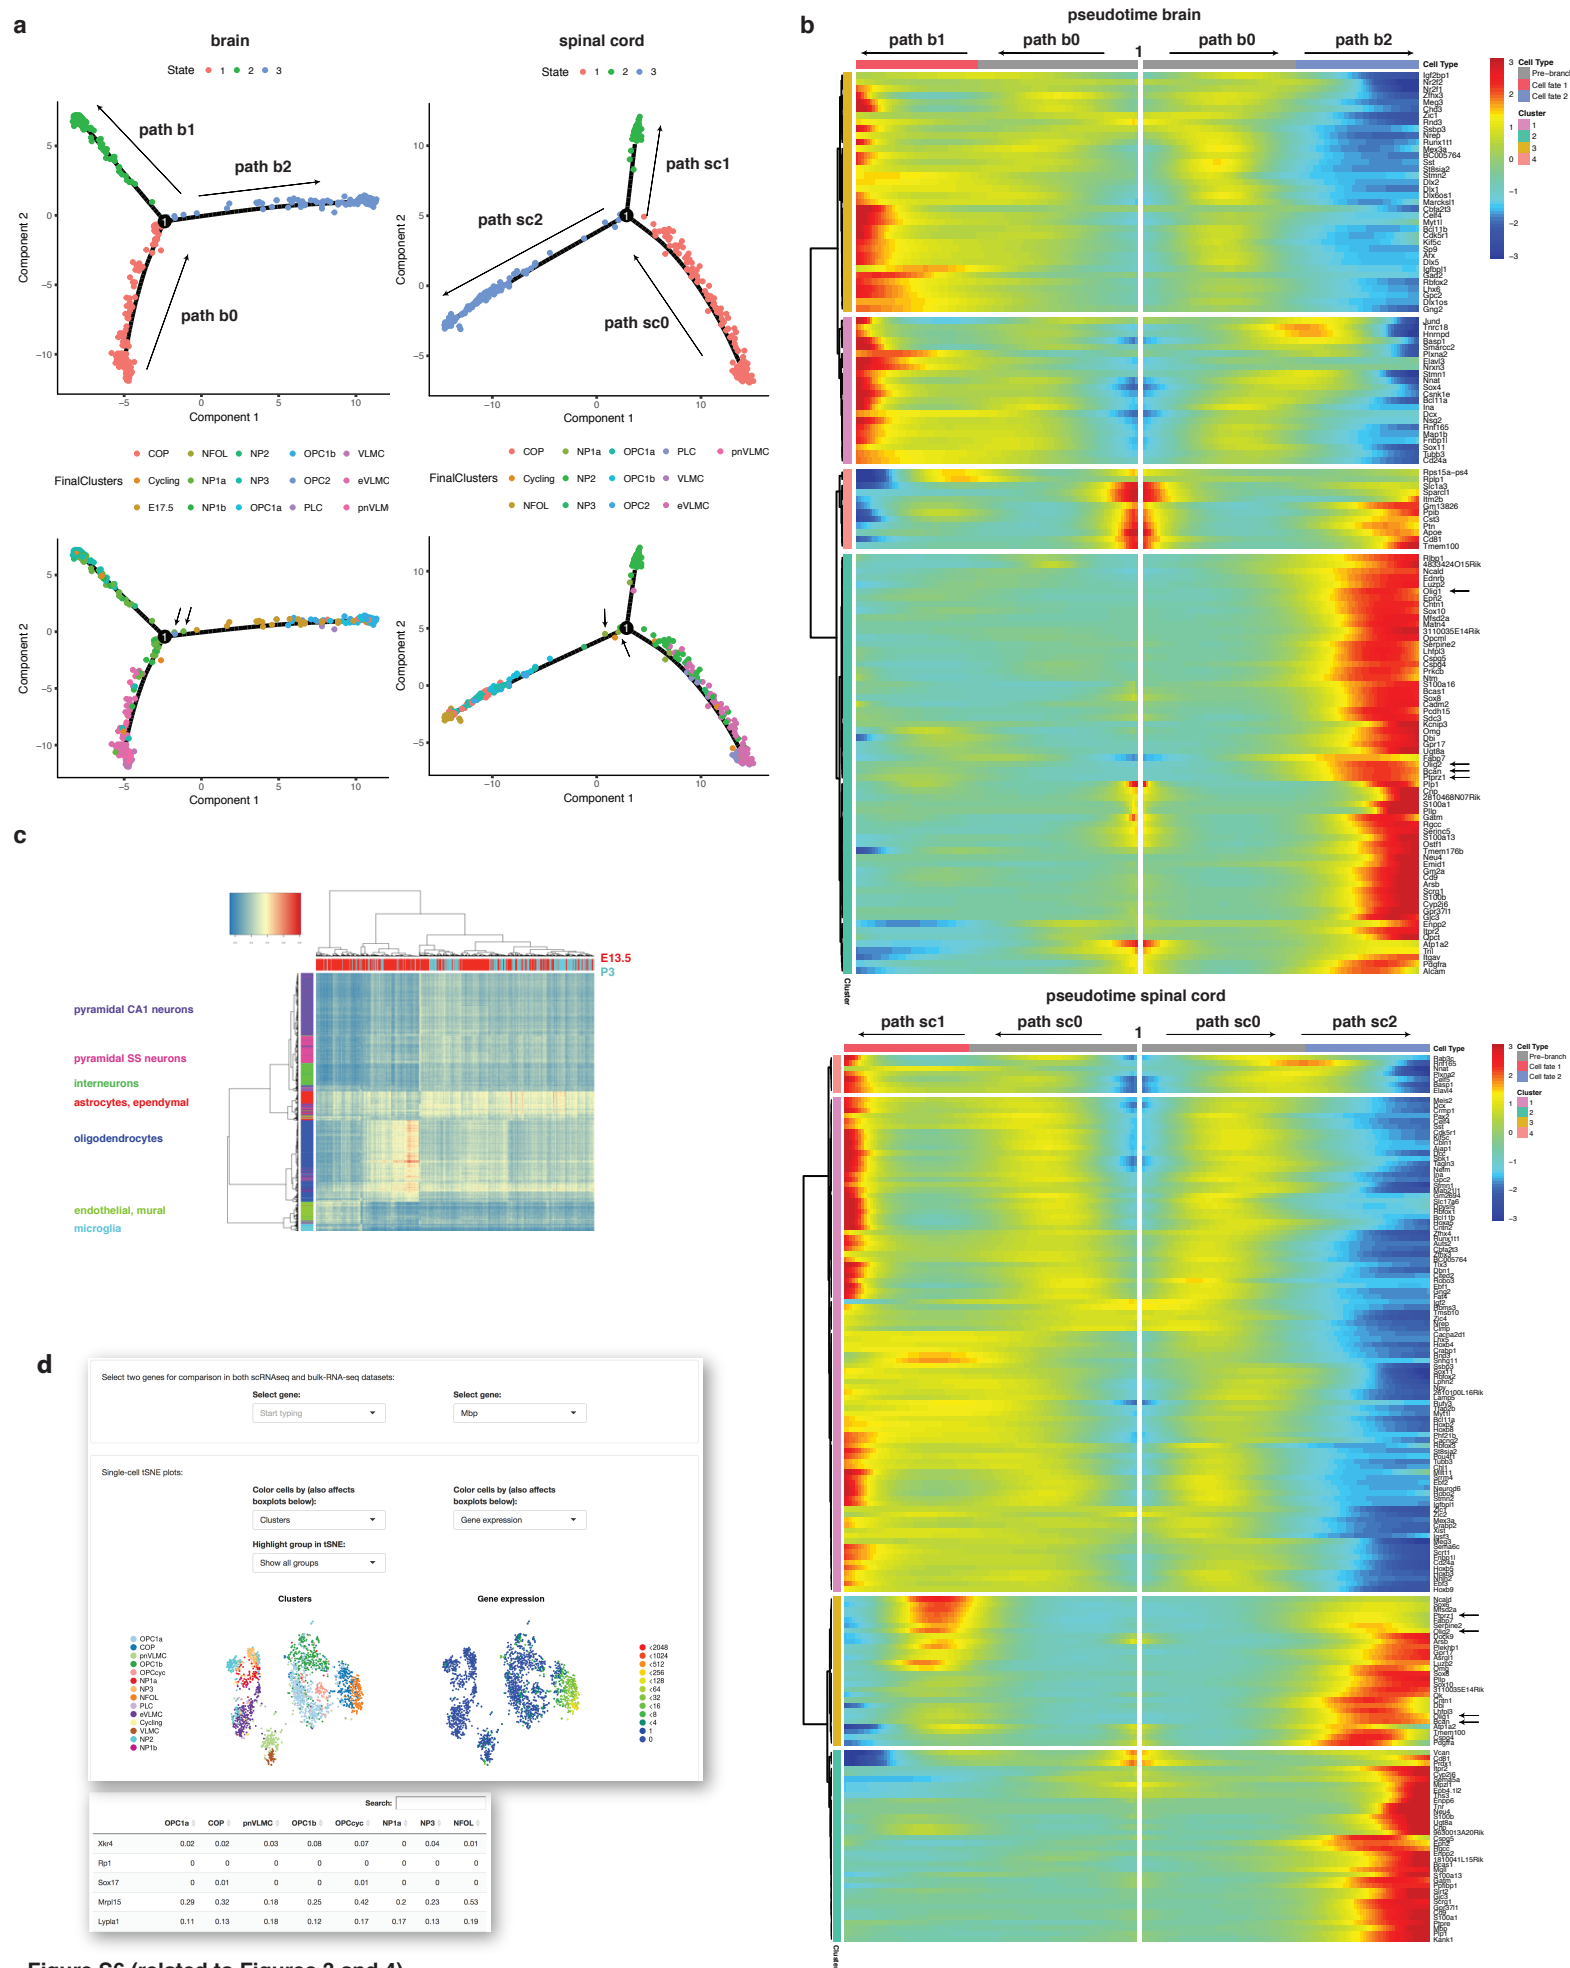

**Figure S6 (related to Figures 3 and 4)**

a) Reverse graph embedding deconvolved path depicting the captured differentiation trajectories in the single cell data from brain (left) and spinal cord (right) by Monocle2. Paths in the brain (b0/1/2) and spinal cord (s0/1/2) are shown as inferred by monocle, where the numbers 0, 1, and 2 stand for VLMC-, Neuronal-, and Oligodendrocyte- fates respectively. b) Differential expression heatmap capturing the most differentially expressed genes related to the oligodendrocyte (path 2) and neuronal lineage (path 1), with respect to the inferred branches in Monocle2. c) Pearson correlation performed on P7/8 single-cell RNAseq dataset obtained from a lineage tracing experiment with *Pdgfra-Cre-ERT/RCE* mice upon injection of tamoxifen at E12.5/13.5 and P3/P4 and Zeisel et al., 2015 single-cell RNA-Seq dataset. d) Screenshots of the resource website app, illustrating the exploration of expression data and table browsing.
